# Supplementary material
Source: HighWire-hosted journal article supplement (https://nutrition.bmj.com/content/bmjnph-2023-000671)
Supplement: inline-supplementary-material-1 [file inline-supplementary-material-1.pdf]

## Appendix A. Complete list features available in the OPEL database, by data source

| Name                           | Description                                                                                                                    | Data Source |
|--------------------------------|--------------------------------------------------------------------------------------------------------------------------------|-------------|
| weight                         | child's weight at visit                                                                                                        | CHICA       |
| wtcentile                      | child's weight percentile                                                                                                      | CHICA       |
| height                         | child's height at visit                                                                                                        | CHICA       |
| htcentile                      | child's height percentile                                                                                                      | CHICA       |
| insurance                      | What kind of insurance, if any, the patient has at time of visit                                                               | CHICA       |
| any_household_members_smoke    | Do any of the people that live with the child smoke?                                                                           | CHICA       |
| car_seat_position_01           | Does the child use a car seat, and if so, which way is it facing?                                                              | CHICA       |
| fluoride_supplemented          | Does the child have fluoride supplemented somehow through consumption?                                                         | CHICA       |
| has_smoke_detector             | Does the child's living area have a smoke detector?                                                                            | CHICA       |
| hc                             | child's head circumference in centimeters                                                                                      | CHICA       |
| hccentile                      | child's head circumference percentile                                                                                          | CHICA       |
| know_how_to_save_choking_child | Do the child's caregivers know how to perform the Heimlich maneuver on a choking child?                                        | CHICA       |
| left_alone_in_water            | Is the child left alone in water?                                                                                              | CHICA       |
| lg_failed                      | What question of the language developmental test did the child fail on?                                                        | CHICA       |
| maternal_depression_concern    | Based on a questionnaire, is there a concern that the mom might be depressed?                                                  | CHICA       |
| medicationallergies            | Does the child have any medication allergies and have the allergies been confirmed by a doctor or only reported by the family? | CHICA       |
| painqualitative                | Is the child in pain, yes, no or NA?                                                                                           | CHICA       |
| ps_passed                      | What is the highest passed question for the psychosocial developmental test?                                                   | CHICA       |
| sleeps_on_side_or_back         | Does the child sleep on their side or back?                                                                                    | CHICA       |
| slept_on_stomach_ever          | Does the child ever sleep on their stomach?                                                                                    | CHICA       |
| uses_walker                    | Does the child use a walker?                                                                                                   | CHICA       |
| baby_left_alone_could_fall     | Is the baby ever left alone where they could fall?                                                                             | CHICA       |
| sleeps_unsafe_soft_surface     | Does the child sleep on an unsafe soft surface such as a mattress that they can suffocate on if they sleep facedown?           | CHICA       |
| tested_smoke_detector          | If the child's living place has a smoke detector, has it been tested as working?                                               | CHICA       |
| abdomen_exam                   | If the child's abdomen is examined, is it abnormal or normal?                                                                  | CHICA       |
| back_exam                      | If the child's back is examined, is it abnormal or normal?                                                                     | CHICA       |
| chestlungs_exam                | If the child's chest or lungs are examined, is it abnormal or normal?                                                          | CHICA       |
| extgenitalia_exam              | If the child's external genitalia is examined, is it normal or abnormal?                                                       | CHICA       |
| extremities_exam               | If the child's extremities (hands, feet, nose, ears) are examined, are they normal or abnormal?                                | CHICA       |
| fm_passed                      | For the fine motor skills developmental test, what is the highest question passed?                                             | CHICA       |
| general_exam                   | If the child had a general exam, was it normal or abnormal?                                                                    | CHICA       |

|                                 |                                                                                                                                                                                           |       |
|---------------------------------|-------------------------------------------------------------------------------------------------------------------------------------------------------------------------------------------|-------|
| gm_passed                       | For the gross motor skills developmental test, what is the highest passed question?                                                                                                       | CHICA |
| head_exam                       | If the child's head is examined, is it normal or abnormal?                                                                                                                                | CHICA |
| heartpulses_exam                | If the child's heart and pulse are examined, is it normal or abnormal?                                                                                                                    | CHICA |
| lg_passed                       | For the language developmental test, what is the highest scoring passed question?                                                                                                         | CHICA |
| neuro_exam                      | If a neurological battery is done, was it normal or abnormal?                                                                                                                             | CHICA |
| nodes_exam                      | If the lymph nodes are checked, were they normal or abnormal?                                                                                                                             | CHICA |
| nosethroat_exam                 | If the nose and throat are examined, are they normal or abnormal?                                                                                                                         | CHICA |
| skin_exam                       | If the child's skin is examined, was it normal or abnormal?                                                                                                                               | CHICA |
| teethgums_exam                  | If the child's teeth and gums are examined, were they normal or abnormal?                                                                                                                 | CHICA |
| preferred_language              | Does the child have a preferred language and if so, is it English or Spanish?                                                                                                             | CHICA |
| burns_knowledge                 | Does the caregiver have knowledge of how to take care of burns?                                                                                                                           | CHICA |
| firearms_at_home                | Are there any firearms in the home?                                                                                                                                                       | CHICA |
| firearms_where_visits           | Are there any firearms where the visit is taking place?                                                                                                                                   | CHICA |
| has_stairway_gates              | Are there child safety gates over the stairways?                                                                                                                                          | CHICA |
| household_products_out_of_reach | Are household cleaning products such as bleach out of the reach of children?                                                                                                              | CHICA |
| matches_lighters_safe           | Are matches and lighters kept in a safe manner? childproof wheel, out of reach, etc.                                                                                                      | CHICA |
| play_area_fenced                | Is the child's play area fenced in?                                                                                                                                                       | CHICA |
| pool_at_house                   | Is there a pool the child can access?                                                                                                                                                     | CHICA |
| chica_devscreen_status          | This is a developmental screening that states whether the child is developing normally or if they are developmentally delayed and indicate which developmental screenings have been done. | CHICA |
| seen_dentist                    | Has the child ever been seen by a dentist? This is unlikely to be true until after the child has teeth.                                                                                   | CHICA |
| taking_medications              | Is the child on any medications and if so, has this list of medications been confirmed to be accurate?                                                                                    | CHICA |
| tv_in_room                      | Is there a TV in the child's bedroom?                                                                                                                                                     | CHICA |
| tv_over_2hrs                    | Does the child watch TV for more than two hours every day?                                                                                                                                | CHICA |
| uses_bottle                     | Does the child use a bottle to eat?                                                                                                                                                       | CHICA |
| asthmastatus                    | Does the child have any asthma symptoms and if so, are they persistent, intermittent, uncontrolled/controlled?                                                                            | CHICA |
| chica_devscreen_sx              | Are there any developmental concerns?                                                                                                                                                     | CHICA |
| lye_drain_cleaners_in_house     | Are there any lye, drain, or other more dangerous cleaners in the house?                                                                                                                  | CHICA |
| ps_failed                       | What question of the psychosocial test did the child fail on?                                                                                                                             | CHICA |
| stop_at_curb                    | Does the child stop at curbs or run straight without stopping?                                                                                                                            | CHICA |
| wears_bike_helmet               | Does the child wear a bike helmet for activities where one is recommended?                                                                                                                | CHICA |
| insurancename                   | What kind of insurance does the child have?                                                                                                                                               | CHICA |
| parents_confident_filling_out   | Do the parents appear confident filling out forms?                                                                                                                                        | CHICA |

|                              |                                                                                                                                           |       |
|------------------------------|-------------------------------------------------------------------------------------------------------------------------------------------|-------|
| parents need help reading    | Do the parents need help reading forms?                                                                                                   | CHICA |
| ten_childrens_books_in_home  | Are there at least 10 children's books in the home available to the child?                                                                | CHICA |
| visittype                    | Is this a visit because the child is sick?                                                                                                | CHICA |
| chica_adhd_sx                | Is the child having symptoms of ADHD?                                                                                                     | CHICA |
| constipation_sx              | Is the child having symptoms of constipation?                                                                                             | CHICA |
| firearms_kept_unloaded       | Are any firearms kept unloaded in the household?                                                                                          | CHICA |
| look_both_ways               | Does the child look both ways before crossing the street?                                                                                 | CHICA |
| unsupervised_near_water      | Is the child left unsupervised near water?                                                                                                | CHICA |
| firearms_discussed           | Has firearm safety been discussed with the child?                                                                                         | CHICA |
| grades_dropped_lately        | Has the child's school grades dropped recently?                                                                                           | CHICA |
| knows_how_to_swim            | Does the child know how to swim?                                                                                                          | CHICA |
| rides_bike_in_street         | Does the child ride their bike in the street?                                                                                             | CHICA |
| school_suspension_this_year  | Has the child been suspended from school this year?                                                                                       | CHICA |
| snoring                      | Have parents noticed that the child snores?                                                                                               | CHICA |
| special_education_classes    | Does the child attend special education classes?                                                                                          | CHICA |
| escape_plan_for_fire         | Has the family discussed a house fire escape plan with their child? Older children version of smoke alarm knows what to do                | CHICA |
| informant                    | What household member is answering the questions?                                                                                         | CHICA |
| smoke_alarm_knows_what_to_do | Does the child know what to do when the smoke/fire alarm is triggered? Younger children version of escape plan for fire                   | CHICA |
| specialneeds                 | Does the child have special needs or accommodations? Such as ear defenders, speech therapist, etc...                                      | CHICA |
| visit_attendee               | What household member is attending the visit but not necessarily the informant?                                                           | CHICA |
| hot_water_heater_adjusted    | Has the water heater been adjusted so the water can only be heated to 120 degrees fahrenheit? This is a scalding concern.                 | CHICA |
| plastic_wrappers_secured     | Are plastic wrappers in the environment secured or left in an accessible area? This is a suffocation hazard.                              | CHICA |
| taking_solid_food            | Is the child eating solid food yet?                                                                                                       | CHICA |
| cutting_food_bite_size       | Are the child's solid foods being cut into bite size pieces before being given to the child? If no, this is a choking/suffocation hazard. | CHICA |
| carries_hot_liquids          | Is the child allowed to carry hot liquids? This is a burn hazard.                                                                         | CHICA |
| play_area_cooking            | Does the child have an area to play and be safely in away from cooking area while caregiver is cooking? This is a burn risk if not.       | CHICA |
| safety_latches_installed     | Have safety latches been installed in the house?                                                                                          | CHICA |
| car_seat_inspection          | Has the child's car seat been inspected and if so, is it forward or rear facing? Rear facing is the safer option.                         | CHICA |
| developmental_referral       | Has the child been referred to developmental testing and if so, have only the first steps been taken or has the appointment been made?    | CHICA |
| fm_failed                    | What difficulty of the fine motor skills test did the child fail on?                                                                      | CHICA |
| correctedvision              | Does the child wear glasses or contact lenses?                                                                                            | CHICA |
| firearms_friends             | Does the child go to friend's houses which have firearms?                                                                                 | CHICA |
| plays_dangerous_items        | Does the child play with dangerous items?                                                                                                 | CHICA |
| wears_sports_protective_gear | Does the child wear protective gear while playing sports?                                                                                 | CHICA |
| safety_caps_on_bottles       | Are there child safety caps on pill bottles around the child?                                                                             | CHICA |

|                                |                                                                                                                                                             |       |
|--------------------------------|-------------------------------------------------------------------------------------------------------------------------------------------------------------|-------|
| wears_life_jacket              | Does the child wear a life jacket in situations where that is recommended?                                                                                  | CHICA |
| bedtime_media                  | Does the child use media products at bedtime?                                                                                                               | CHICA |
| daytime_sleepiness             | Is the child sleepy during the day?                                                                                                                         | CHICA |
| questionnaireinformants        | Which caregiver filled out the questionnaire?                                                                                                               | CHICA |
| sleep_quantity                 | Does the child get sufficient or insufficient sleep?                                                                                                        | CHICA |
| chica_t2dm_fh                  | Does the child's medical records include family history?                                                                                                    | CHICA |
| chica_t2dm_gdm                 | Did the child's mother have gestational diabetes?                                                                                                           | CHICA |
| chica_t2dm_lga                 | Was the child large for their gestational age during pregnancy?                                                                                             | CHICA |
| epilepsy_history               | Is there a family-reported family history of epilepsy?                                                                                                      | CHICA |
| breast_feeding_help_needed     | Does the mother need help breastfeeding?                                                                                                                    | CHICA |
| oral_exam                      | Has the child's mouth been examined and if so, was it normal or abnormal?                                                                                   | CHICA |
| bp_eval                        | Has the child's blood pressure been evaluated and if so, was it elevated once or repeatedly elevated? There was no option for hypotensive in this variable. | CHICA |
| empty_container_after_use      | Do caregivers empty bathwater container immediately after use? This is a drowning risk if no.                                                               | CHICA |
| well_water                     | Does the child's household run off well-water? Well-water is a contamination concern.                                                                       | CHICA |
| lowliteracyrisk                | Is the child at risk of low literacy and if so, have they gone to a clinic to help?                                                                         | CHICA |
| morning_headaches              | Does the child have headaches in the morning or wake up with a headache?                                                                                    | CHICA |
| nocturnal_enuresis             | Does the child wet the bed/pee during sleep? This question is for kids who are out of diapers.                                                              | CHICA |
| stops_breathing_at_night       | Does the child's caregiver know if the child stops breathing during the night?                                                                              | CHICA |
| trouble_breathing_at_night     | Does the child's caregiver know if the child has trouble breathing during the night?                                                                        | CHICA |
| wakes_with_snort               | Does the child caregiver know if the child wakes up with a snort?                                                                                           | CHICA |
| rides_after_dark               | Does the child ride the bike after sunset?                                                                                                                  | CHICA |
| knows_rules_of_road            | Does the child know traffic rules?                                                                                                                          | CHICA |
| swims_fast_moving_water        | Does the child swim in fast-moving water such as a river?                                                                                                   | CHICA |
| chica_adhd_dx                  | Does the child have an ADHD diagnosis?                                                                                                                      | CHICA |
| doors_secure                   | Are the doors in the child's home secure?                                                                                                                   | CHICA |
| sharp_edged_furniture          | Are there sharp-edged furniture in the child's home?                                                                                                        | CHICA |
| pulseox                        | What was the child's pulse oxygenation percentage at visit?                                                                                                 | CHICA |
| has_window_guards              | Does the child home have window guards?                                                                                                                     | CHICA |
| play_equipment_protected       | Does the child play on safe playground equipment?                                                                                                           | CHICA |
| asthmasymptoms                 | Does the child have symptoms of asthma?                                                                                                                     | CHICA |
| gm_failed                      | What gross motor test did the child fail on?                                                                                                                | CHICA |
| chica_adhd_side_effects        | Does the child experience side effects from their ADHD medication?                                                                                          | CHICA |
| irondeficiencyscreenqualitativ | Has the child been checked for iron deficiency and if so, what were the results?                                                                            | CHICA |
| chica_devscreen_management     | Is the child part of activities specifically made for children?                                                                                             | CHICA |
| normal_newborn_screen          | Did the child have the normal newborn screen and if so, what were the results?                                                                              | CHICA |

|                                |                                                                                                  |       |
|--------------------------------|--------------------------------------------------------------------------------------------------|-------|
| vaccine_given                  | Has the child had the HPV, Tdap, or meningococcal vaccine given?                                 | CHICA |
| anhedonia_past_few_weeks       | Has the child been anhedonic/apathetic the last few weeks?                                       | CHICA |
| cigarettes_snuff_friend        | Does the child's friend or friend's household use cigarettes or snuff?                           | CHICA |
| cigarettes_snuff_live_with     | Does someone the child lives with use snuff?                                                     | CHICA |
| ever_use_tobacco               | Has the child ever used tobacco?                                                                 | CHICA |
| has_drunk_alcohol              | Has the child drunk alcohol at all?                                                              | CHICA |
| has_gotten_high                | Has the child used an illicit substance?                                                         | CHICA |
| has_had_forced_sex_act         | Has the child experienced a forced sex act?                                                      | CHICA |
| has_had_intercourse            | Has the child had intercourse?                                                                   | CHICA |
| sad_past_few_weeks             | Has the child been sad in the past few weeks?                                                    | CHICA |
| suicide_concerns               | Is there a concern of suicidality for the child?                                                 | CHICA |
| used_marijuana                 | Has the child used marijuana?                                                                    | CHICA |
| interested_birth_control       | Is the child interested in contraception?                                                        | CHICA |
| ready_to_quit                  | Is the child ready to quit smoking cigarettes?                                                   | CHICA |
| watches_tv                     | Does the child watch TV?                                                                         | CHICA |
| sleep_problems                 | Does the child have problems sleeping?                                                           | CHICA |
| nobp                           | Child did not cooperate in visit; Could not check blood pressure.                                | CHICA |
| nohearing                      | Child did not cooperate in visit; Could not perform hearing exam.                                | CHICA |
| risk_based_hearing_screen      | Has the child undergone a hearing screen that was ordered based on high risk?                    | CHICA |
| chica_devscreen_treatment      | Does the child have a written care plan or access to family support services?                    | CHICA |
| anxiety_status                 | Does the child have an anxiety diagnosis, or has this questionnaire been deferred?               | CHICA |
| phq9_score                     | What was the mother's depression score on the phq9?                                              | CHICA |
| driven_with_drunk              | Has the child driven while drunk?                                                                | CHICA |
| drunk_and_activity             | Has the child been drunk while doing an activity?                                                | CHICA |
| drunk_last_month               | Has the child been drunk in the last month?                                                      | CHICA |
| family_substance_abuse         | Does the child's family abuse any substances?                                                    | CHICA |
| happy_how_things_going         | Is the child happy with life?                                                                    | CHICA |
| uses_drugs                     | Does the child use drugs?                                                                        | CHICA |
| sudep_risk_counseling          | Is the child at risk for sudden unexpected death from epilepsy? If so, is the risk high or low?  | CHICA |
| surgical_hx                    | Has the child had their tonsils and adenoids removed?                                            | CHICA |
| feed_at_night                  | Does the child eat at night?                                                                     | CHICA |
| contraceptive_method_discussed | Has birth control been discussed with the child such as condoms and hormonal birth control?      | CHICA |
| abuse_otc                      | Does the child abuse over the counter medication?                                                | CHICA |
| abuse_steroids                 | Does the child abuse steroids drugs?                                                             | CHICA |
| criticized_for_drinking        | Has the child been criticized for drinking?                                                      | CHICA |
| friends_use_drugs              | Has the child's friends used drugs (other than alcohol/caffeine) in the last month?              | CHICA |
| friend_drunk_last_month        | Has the child's friends been drunk in the last month?                                            | CHICA |
| fun_in_past_two_weeks          | Does the child think they've had fun in the last two weeks?                                      | CHICA |
| bike_has_coaster_brakes        | Does the child's bike have coaster brakes? Coaster brakes allow you to pedal backwards to brake. | CHICA |
| past_depression_or_suicide     | Has the child had any previous history of depression or suicidality?                             | CHICA |
| immune_compromise              | Is the child immuno-compromised?                                                                 | CHICA |

|                                  |                                                                                                                        |       |
|----------------------------------|------------------------------------------------------------------------------------------------------------------------|-------|
| prescription_for_cessation       | Is the child on a prescribed nicotine replacement drug?                                                                | CHICA |
| intercourse_past_year            | Has the child had intercourse in the last year?                                                                        | CHICA |
| might_be_pregnant                | Could the child be pregnant?                                                                                           | CHICA |
| medication                       | Does the child have a Ritalin prescription?                                                                            | CHICA |
| depression_workup                | Is there a developed safety plan for the child's depression?                                                           | CHICA |
| chica_autism_risk                | Is the child at a higher risk of autism due to family history?                                                         | CHICA |
| tooth_erupted                    | Has the child had a tooth erupt from beneath the gums yet?                                                             | CHICA |
| autism_behavior_problems         | Does the child have autism related behavior problems?                                                                  | CHICA |
| autism_cam                       | Does the child use complementary alternative medicine for autism?                                                      | CHICA |
| autism_financial_concerns        | Are there financial concerns related to the child's autism such as paying for therapy?                                 | CHICA |
| autism_parent_needs_respite      | Is the child's caregiver in need of a break? i.e. showing symptoms of caregiver burnout                                | CHICA |
| patient_in_mental_health         | Is the child undergoing mental health care?                                                                            | CHICA |
| food_insecurity                  | Is the child's caregiver worried about getting enough food and if so, has this been MD confirmed or resolved?          | CHICA |
| rental_status                    | Is the child's rental home clean & safe vs having issues, and has this been confirmed by an MD?                        | CHICA |
| snapdeniedlast30days             | Has the child's SNAP(food stamps) been denied in the last 30 days?                                                     | CHICA |
| utility_status                   | Has the child's household had one of their utilities (water, power, heat, gas) shut off? Yes, no, or yes but not heat. | CHICA |
| mlp_condition_type               | Is the child's family going through an eviction, on the SNAP program, or renting?                                      | CHICA |
| wakes_up_one_or_more_times_a_n   | Does the child wake up at least once during the night?                                                                 | CHICA |
| wakes_up_and_needs_help_to_sleep | Does the child wake up at night and need help getting back to sleep?                                                   | CHICA |
| sleeps_on_back                   | Does the child sleep on their back?                                                                                    | CHICA |
| slept_on_stomach_side_ever       | Does the child ever sleep on their stomach or side?                                                                    | CHICA |
| abuse_concern                    | Is there a concern that the child is being abused?                                                                     | CHICA |
| constipation_dx                  | Has the child been diagnosed with constipation?                                                                        | CHICA |
| parent_thinks_child_has_sleep_pr | Do the caregivers think that the child has problems with their sleep?                                                  | CHICA |
| eyesvision_exam                  | Did the child have a normal or abnormal vision exam?                                                                   | CHICA |
| breastfed                        | Is the child being breastfed at this time?                                                                             | CHICA |
| psfsicklecell                    | Result of pre-screening form on tablet for sickle cell anemia.                                                         | CHICA |
| negativeenvironmentalhistory     | Was the child potentially exposed to something negative in their environment such as tuberculosis or lead?             | CHICA |
| negativenutritionhistory         | Did the child have nutrition problems such as early introduction to cow milk or needing low iron formula?              | CHICA |
| negativepastmedicalhistory       | Did the child have a low birth weight?                                                                                 | CHICA |
| cholesterol_screen               | Is the child at risk of high cholesterol based on parental history?                                                    | CHICA |
| earshearing_exam                 | Did the child have a normal or abnormal hearing exam?                                                                  | CHICA |
| hearingleft                      | Does the child have full or partial hearing in their left ear?                                                         | CHICA |
| hearingright                     | Does the child have full or partial hearing in their right ear?                                                        | CHICA |
| ppd_result                       | What was the result of the mother's post-partum depression assessment?                                                 | CHICA |
| venousbloodleadqualitative       | How much lead was in the child's blood, if tested?                                                                     | CHICA |

|                      |                                                                                                                    |                 |
|----------------------|--------------------------------------------------------------------------------------------------------------------|-----------------|
| mother bmi           | Maternal body mass index                                                                                           | MCPHD           |
| PNC_Clinic_Type      | Type of prenatal care clinic                                                                                       | MCPHD           |
| Sex                  | Child's sex                                                                                                        | MCPHD           |
| FATHER_OCCUP_DSCRPT  | Is child's father employed at time of birth?                                                                       | MCPHD           |
| MomNativeAm          | Is child's mother Native American?                                                                                 | MCPHD           |
| Mother_Weight_Gain_P | How many pounds the mother has gained during pregnancy.                                                            | MCPHD           |
| MARRIED_NOW          | Are child's parents married at time of birth?                                                                      | MCPHD           |
| APGAR5               | Appearance, Pulse, Grimace, Activity, and Respiration at five minutes post birth. Score of 10 is good; one is bad. | MCPHD           |
| BIRTH_WEIGHT_GRAM    | Birth weight in grams from modern birth certificate                                                                | MCPHD           |
| finalroute           | How was the child delivered?                                                                                       | MCPHD           |
| HEP_B_TEST           | Was hepatitis B vaccine given at birth?                                                                            | MCPHD           |
| Apgar1               | Appearance, Pulse, Grimace, Activity, and Respiration at 1 minute post birth. Score of 10 is good; one is bad.     | MCPHD           |
| Dad_Race9Eth         | race of child's father                                                                                             | MCPHD           |
| Mom_Race9Eth         | race of child's mother                                                                                             | MCPHD           |
| PREN_VISIT_NBR       | number of prenatal care visits                                                                                     | MCPHD           |
| EST_GEST             | estimated gestation in weeks                                                                                       | MCPHD           |
| MOTHER_AGE           | age of the mother at birth in years                                                                                | MCPHD           |
| FATHER_AGE           | age of the father at birth in years                                                                                | MCPHD           |
| PREVIOUS_LIVE_NBR    | How many living babies has the mother giving birth to before?                                                      | MCPHD           |
| plurality            | Is this a plural or singleton birth? (twins)                                                                       | MCPHD           |
| BREAST_FED           | Was the child breast-fed at hospital release?                                                                      | MCPHD           |
| MOTHER_ED            | mother's education level in years                                                                                  | MCPHD           |
| FATHER_ED            | father's education level in years                                                                                  | MCPHD           |
| LD_MECONIUM          | delivery complication: was there meconium present at delivery?                                                     | MCPHD           |
| LD_NONE              | no delivery complications                                                                                          | MCPHD           |
| LD_NON_VERTEX        | delivery complication: child in non- vertex position                                                               | MCPHD           |
| firstpnc             | prenatal care initiated in first trimester                                                                         | MCPHD           |
| wtgrams              | child's birth weight in grams                                                                                      | MCPHD           |
| PREV_BIRTH_TOTAL     | number of previous live births – all birth certificates                                                            | MCPHD           |
| Kotelchuck           | adequacy of prenatal care index                                                                                    | MCPHD           |
| mdpsmoke             | Did the mother smoke during pregnancy?                                                                             | MCPHD           |
| abcond               | Were abnormal conditions present at birth?                                                                         | MCPHD           |
| anomaly              | Was a congenital anomaly found?                                                                                    | MCPHD           |
| infect               | maternal infections                                                                                                | MCPHD           |
| labdel               | labor and delivery                                                                                                 | MCPHD           |
| mmorb                | maternal morbidity                                                                                                 | MCPHD           |
| methdel              | method of delivery                                                                                                 | MCPHD           |
| oblab                | obstetrical labor                                                                                                  | MCPHD           |
| obproc               | obstetrical procedures                                                                                             | MCPHD           |
| risk                 | maternal risk factor                                                                                               | MCPHD           |
| RACE                 | race of the child                                                                                                  | CHICA           |
| ETHN                 | ethnicity of the child                                                                                             | CHICA           |
| wic_ever             | Has the child ever been in the WIC program?                                                                        | CHICA/<br>MCPHD |
| PERINPOVN1           | persons living in poverty as percentage of population                                                              | SAVI            |
| VIOLNTN2             | violent crime (including simple assaults) per 1,000 people                                                         | SAVI            |
| VIOLNSTN2            | violent crime (not including simple assaults) per 1,000 people                                                     | SAVI            |
| AGGVASLTN2           | aggravated assaults per 1,000 people                                                                               | SAVI            |

|                     |                                                                         |      |
|---------------------|-------------------------------------------------------------------------|------|
| ROBBERYN2           | robberies per 1,000 people                                              | SAVI |
| PROPERTYN2          | property crime per 1,000 people                                         | SAVI |
| THFTVHN2            | vehicle thefts per 1,000 people                                         | SAVI |
| BURGLARYN2          | burglaries per 1,000 people                                             | SAVI |
| WALKSCORE           | walkability score                                                       | SAVI |
| FRRDTRAN1           | free and reduced lunch program participants as percentage of enrollment | SAVI |
| POVB185N1           | population below 185% poverty (proxy for reduced lunch)                 | SAVI |
| POVB125N1           | population below 125% poverty (proxy for free lunch)                    | SAVI |
| RESNEWPEN1          | total residential building permits per 100 housing units                | SAVI |
| COMMALLPN1          | total commercial building permits per 100 housing units                 | SAVI |
| TREE CANOPY         | tree canopy as percentage of land area                                  | SAVI |
| PCT POP FOOD DESERT | percentage of population far from grocery stores                        | SAVI |
