# Supplementary material
Source: HighWire-hosted journal article supplement (https://nutrition.bmj.com/content/bmjnph-2023-000671)
Supplement: inline-supplementary-material-2 [file inline-supplementary-material-2.pdf]

## Appendix B. Deterministic and probabilistic matching elements

| ALGORITHM              |      | BLOCKING VARIABLES  | MATCHING VARIABLES                                   | THRESHOLD | # MATCHED BABIES (INCREMENTAL) |
|------------------------|------|---------------------|------------------------------------------------------|-----------|--------------------------------|
| DETERMINISTIC MATCHING | DM1  | LN/FN/DOB           |                                                      |           | 17,240                         |
|                        | DM2  | LN=Father_LN/FN/DOB |                                                      |           | 350                            |
|                        | DM3  | LN=Mother_LN/FN/DOB |                                                      |           | 582                            |
| PROBABILISTIC MATCHING | PM1  | LN/DOB              | FN/FN_Soundex/SEX                                    | -31       | 523                            |
|                        | PM2  | FN/DOB              | LN/LN_Soundex/SEX                                    | -26       | 795                            |
|                        | PM3  | DOB                 | LN/FN/MN/LN_Soundex/FN_Soundex/SEX                   | 7         | 35                             |
|                        | PM4  | YB/FI               | LN/FN/MN/MB/DB/LN_Soundex/FN_Soundex/SEX             | 13        | 46                             |
|                        | PM5  | MB/FI               | LN/FN/MN/YB/DB/LN_Soundex/FN_Soundex/SEX             | 19        | 12                             |
|                        | PM6  | DB/FI               | LN/FN/MN/YB/MB/LN_Soundex/FN_Soundex/SEX             | 19        | 3                              |
|                        | PM7  | (LN=Mother_LN)/DOB  | FN/FN_Soundex/SEX                                    | -1        | 29                             |
|                        | PM8  | FN/DOB              | (LN=Mother_LN)/LN_Soundex/SEX                        | 11        | 17                             |
|                        | PM9  | DOB                 | (LN=Mother_LN)/FN/MN/LN_Soundex/FN_Soundex/SEX       | 23        | 1                              |
|                        | PM10 | YB/FI               | (LN=Mother_LN)/FN/MN/MB/DB/LN_Soundex/FN_Soundex/SEX | 12.3      | -                              |
|                        | PM11 | MB/FI               | (LN=Mother_LN)/FN/MN/YB/DB/LN_Soundex/FN_Soundex/SEX | 12.3      | -                              |

|      |                    |                                                      |              |               |
|------|--------------------|------------------------------------------------------|--------------|---------------|
| PM12 | DB/FI              | (LN=Mother_LN)/FN/MN/YB/MB/LN_Soundex/FN_Soundex/SEX | 12.67        | -             |
| PM13 | (LN=Father_LN)/DOB | FN/FN_Soundex/SEX                                    | -6           | 3             |
| PM14 | FN/DOB             | (LN=Father_LN)/LN_Soundex/SEX                        | -51          | 7             |
| PM15 | DOB                | (LN=Father_LN)/FN/MN/LN_Soundex/FN_Soundex/SEX       |              | -             |
| PM16 | YB/FI              | (LN=Father_LN)/FN/MN/MB/DB/LN_Soundex/FN_Soundex/SEX |              | -             |
| PM17 | MB/FI              | (LN=Father_LN)/FN/MN/YB/DB/LN_Soundex/FN_Soundex/SEX | 12           | -             |
| PM18 | DB/FI              | (LN=Father_LN)/FN/MN/YB/MB/LN_Soundex/FN_Soundex/SEX |              | -             |
|      |                    | Manual Review                                        |              | 214           |
|      |                    |                                                      | <b>Total</b> | <b>19,857</b> |
